# Supplementary material
Source: PubMed Central journal article supplement (PMC3089749)
Supplement: joa0218-0534-SD2.pdf [file joa0218-0534-SD2.pdf]

**Supplement Table 1. Tooth phenotypes in mice with mutation of fgf signalling related molecules**

| <b>Mutant mice</b>                            | <b>Phenotypes</b>                       | <b>Reference</b>                          |
|-----------------------------------------------|-----------------------------------------|-------------------------------------------|
| <b>Ligands</b>                                |                                         |                                           |
| <i>Fgf3 null</i>                              | abnormal shape in molars                | Wang et al., 2007<br>Charles et al., 2009 |
| <i>Fgf10 null</i>                             | lack of cervical loop                   | Harada et al., 2002                       |
| <i>Fgf3<sup>-/-</sup>;10<sup>+/-</sup></i>    | small molars                            | Wang et al., 2007                         |
| <i>Fgf3<sup>-/-</sup>;10<sup>-/-</sup></i>    | lack of cervical loop                   | Wang et al., 2007                         |
| <b>Receptors</b>                              |                                         |                                           |
| <i>Fgfr2IIIb null</i>                         | Arrest of development at bud stage      | De Moerlooze et al., 2000                 |
| <i>Fgfr2<sup>tm</sup>;K14Cre</i>              | Arrest of development at bud stage      | Hosokawa et al., 2009                     |
| <i>Fgfr2<sup>tm</sup>;Nkx3.1Cre</i>           | Failure of maintenance of cervical loop | Lin et al., 2009                          |
| <i>Fgfr1<sup>tm</sup>;K14Cre</i>              | abnormal enamel formation               | Takamori et al., 2008                     |
| <b>Related molecules</b>                      |                                         |                                           |
| <i>Sprouty2</i>                               | supernumerary tooth in diastema         | Klein et al., 2006                        |
| <i>Sprouty4</i>                               | supernumerary tooth in diastema         | Klein et al., 2006                        |
| <i>Sprouty2<sup>+/-</sup>;4<sup>-/-</sup></i> | Bilateral enamel deposition             | Klein et al., 2008                        |
